# Supplementary material for: Structural Predictive Model of Presenilin-2 Protein and Analysis of Structural Effects of Familial Alzheimer’s Disease Mutations
Source: Hindawi journal article supplement (doi:10.1155/2021/9542038), 2021-11-29
Supplement: f1 [file 9542038.f1.pdf]

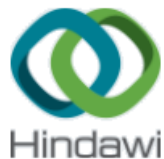

## *Supplementary Material*

### **Structural predictive model of Presenilin-2 protein and analysis of structural effects of familial Alzheimer's disease mutations**

**Alejandro Soto-Ospina<sup>1,3</sup>, Pedronel Araque Marín<sup>2\*</sup>, Gabriel de Jesús Bedoya<sup>1</sup> and Andrés Villegas Lanau<sup>1,3\*</sup>**

<sup>1</sup>University of Antioquia, Faculty of Medicine, Group Molecular Genetics, Medellín, Colombia.

<sup>2</sup>EIA University, School of Life Sciences, Research and Innovation in Chemistry Formulations Group, Envigado, Colombia

<sup>3</sup>University of Antioquia, Faculty of Medicine, Group Neuroscience of Antioquia, Medellín, Colombia.

**\*To whom correspondence should be addressed:**

Alejandro Soto Ospina, e-mail: johnny.soto@udea.edu.co

University of Antioquia, Faculty of Medicine, Group Molecular Genetic (GenMol), Calle 62 #52-59 Laboratory 430, Medellín - Antioquia, Colombia.

Andrés Villegas Lanau, e-mail: andres.villegas@udea.edu.co

University of Antioquia, Faculty of Medicine, Group Molecular Genetic (GenMol), Calle 62 #52-59 Laboratory 411-412, Medellín - Antioquia, Colombia.

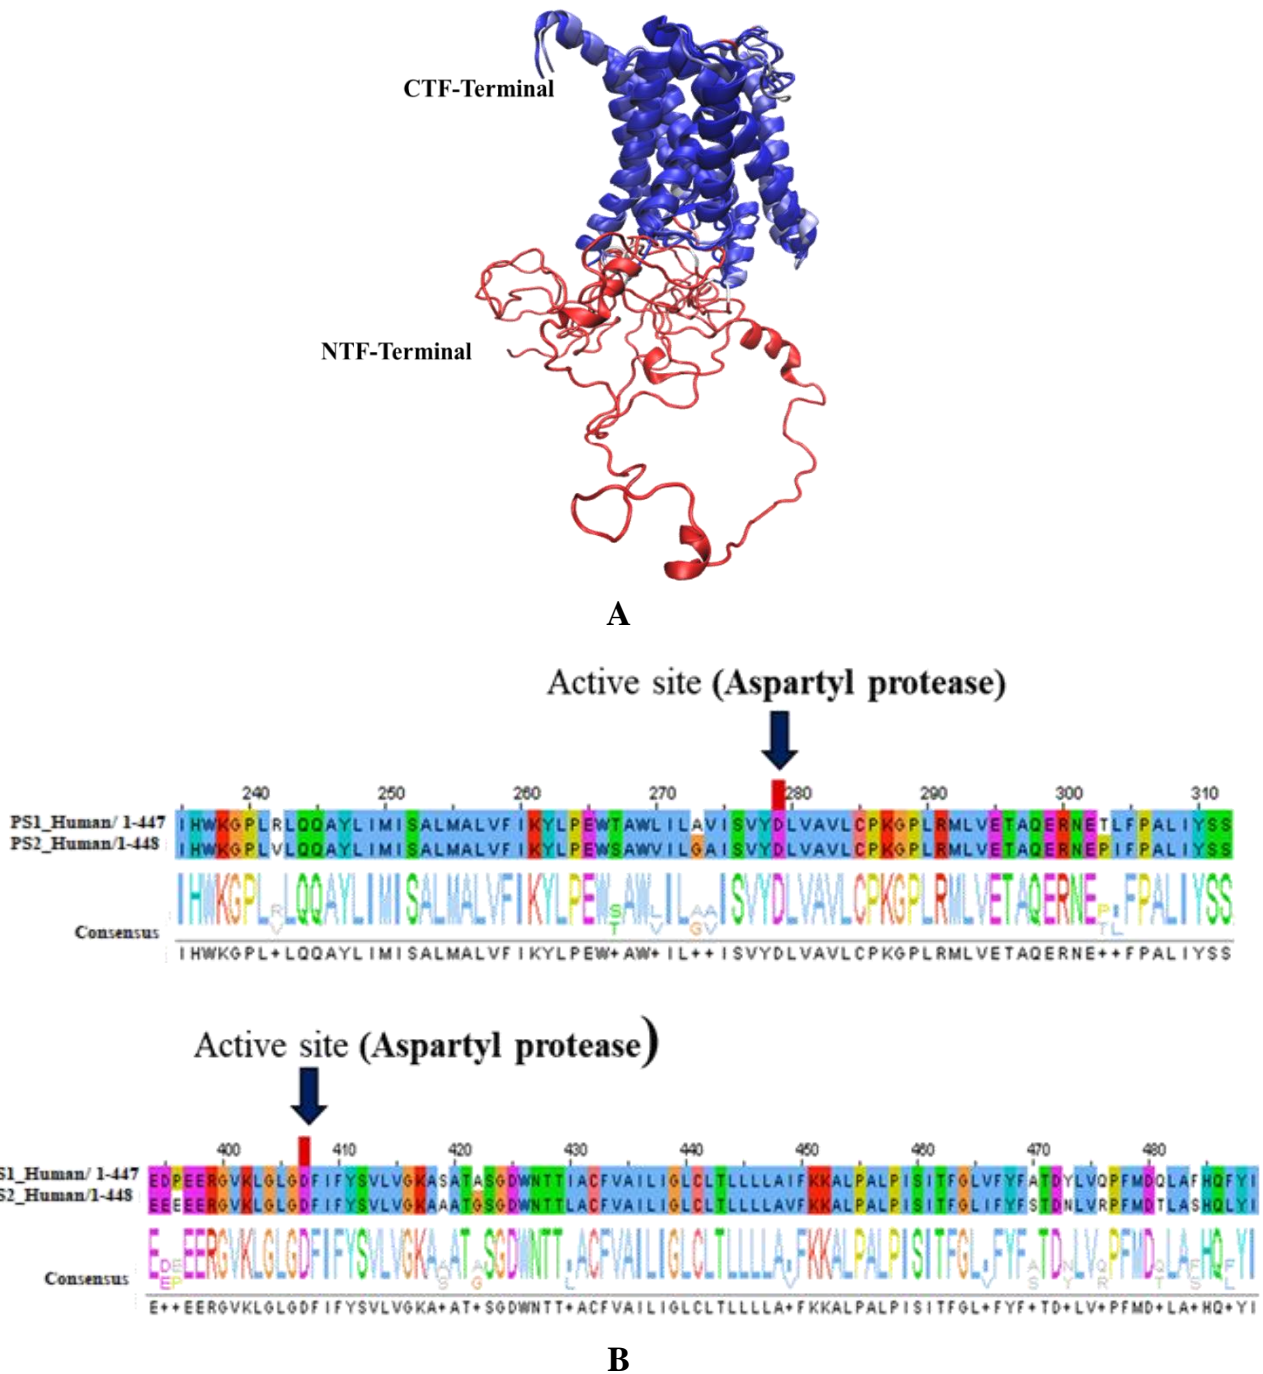

**Sup. Figure 1.** Alignment of PS1 protein with PS2: A) Quantitative multi-alignment of proteins at 3D level using color coding: values are considered in the alignment in (Red) with high standard deviation (RMSD), standard deviation in the range of [2.0-2.5] Å (White), highly conserved and low standard deviation regions (Blue); B) Active site alignment of the primary amino acid sequence of PS1 with PS2.

— Hydrogen bonds with constraints 2.7Å and 45°

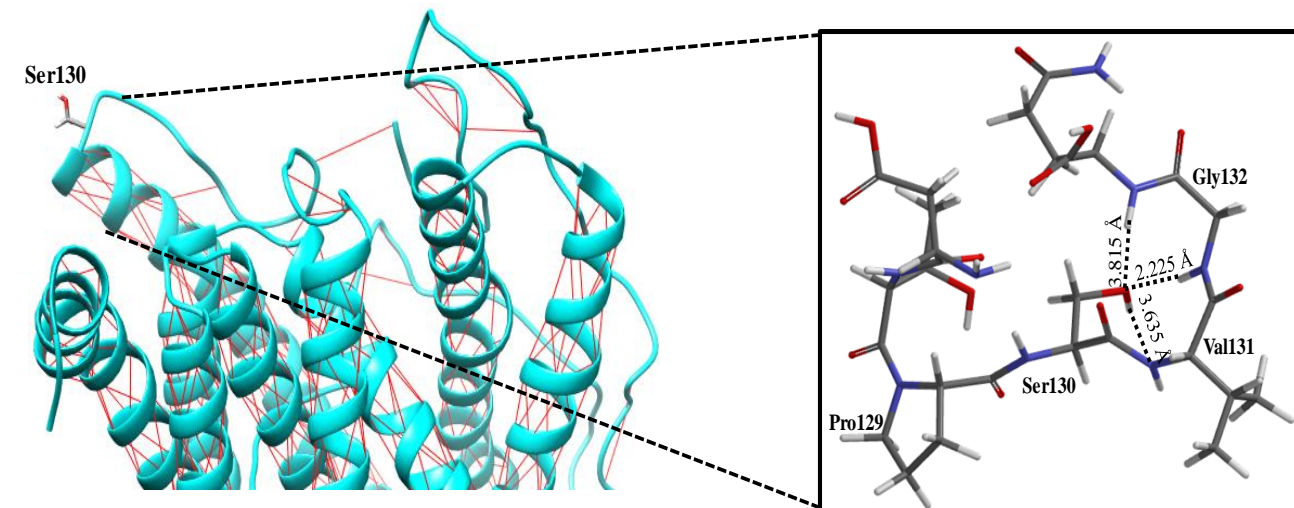

A

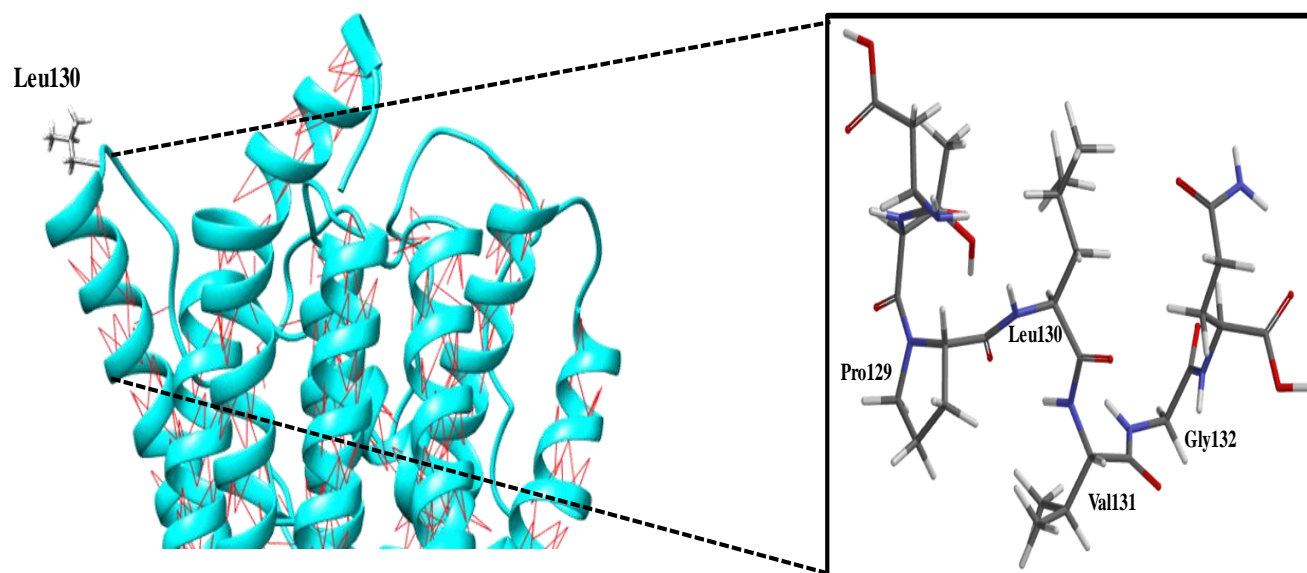

B

**Sup. Figure 2.** Topological and electronic structure change of the Ser130Leu mutation: A) Hydrogen bonds calculation (red) in ribbon representation of the wild-type PS2 protein; B) Hydrogen bonds calculation (red) in ribbon representation of the Ser130Leu PS2 protein mutation.

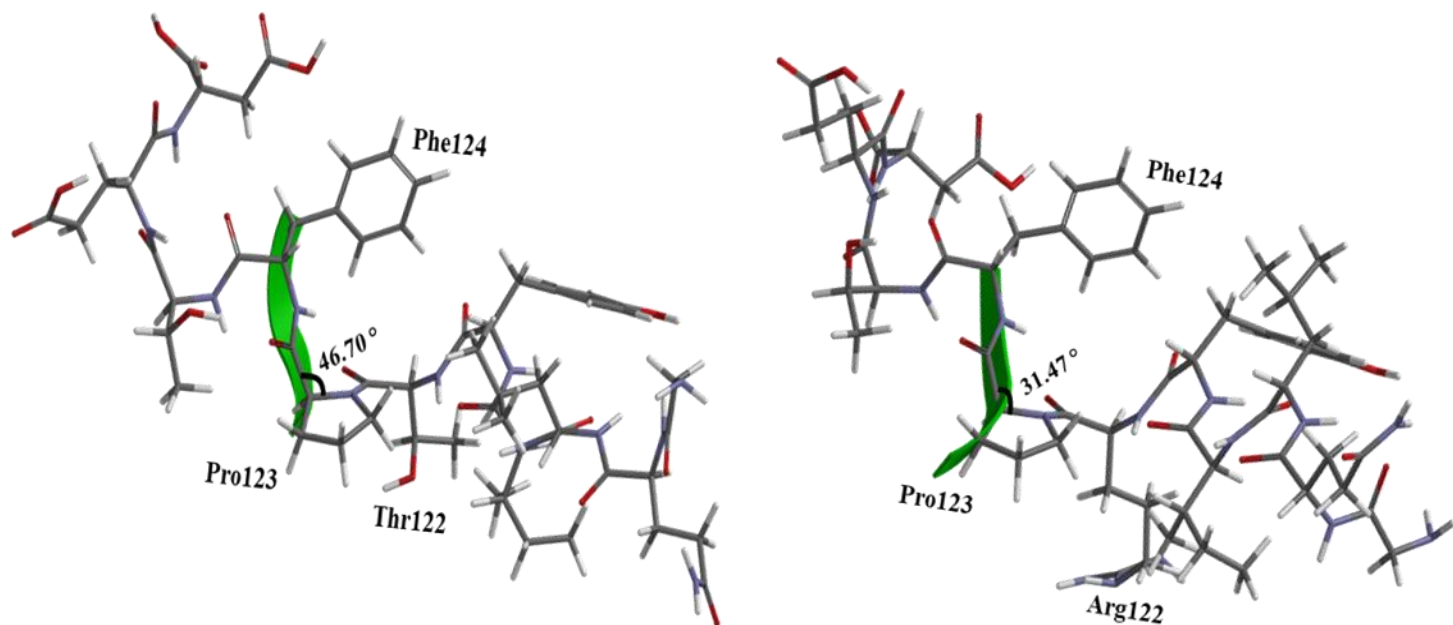

**Sup. Figure 3.** Angle change for PS2 wild type protein (Left) and Thr122Arg mutation (Right).

**Table Sup.1**

| Canonical function TM2-TM3-TM5 |                       |                        |                     |         |         |                      |
|--------------------------------|-----------------------|------------------------|---------------------|---------|---------|----------------------|
| Protein PS2 (239)              | Energy total (kJ/mol) | Amount of A $\beta$ 40 | Amount A $\beta$ 42 | Delta40 | Delta42 | Hidropathicity (239) |
| Wild type 1                    | 328534,4815           | 1,00                   | 1,00                | 0,00    | 0,00    | 2,644                |
| M239I                          | 331629,757            | 0,44                   | 3,14                | -0,56   | 2,14    | 2,933                |
| M239V                          | 330776,1052           | 0,31                   | 3,30                | -0,69   | 2,30    | 2,900                |

**A**

| Moonlighting function TM1-TM2 |                       |                        |                     |         |         |                       |                      |
|-------------------------------|-----------------------|------------------------|---------------------|---------|---------|-----------------------|----------------------|
| Protein PS2 (130)             | Energy total (kJ/mol) | Amount of A $\beta$ 40 | Amount A $\beta$ 42 | Delta40 | Delta42 | Phosphorylation (130) | Hidropathicity (130) |
| Wild type 2                   | 334625,8934           | 1,00                   | 1,00                | 0,00    | 0,00    | 0,627                 | -1,589               |
| S130L                         | 335897,732            | 0,86                   | 1,22                | -0,14   | 0,22    | 0                     | -1,078               |

**B**

| Moonlighting function TM1-TM2 |                       |                        |                     |                       |                       |                      |
|-------------------------------|-----------------------|------------------------|---------------------|-----------------------|-----------------------|----------------------|
| Protein PS2                   | Energy total (kJ/mol) | Amount of A $\beta$ 40 | Amount A $\beta$ 42 | Phosphorylation (122) | Phosphorylation (125) | Hidropathicity (122) |
| Wild type                     | 333370,1626           | N/D                    | N/D                 | 0,513                 | 0,431                 | -0,022               |
| T122R                         | 318579,7143           | N/D                    | N/D                 | 0                     | 0,712                 | -0,444               |

**C**

**Table Sup.1** Energetic values calculated in the system with PS2 in the  $\gamma$ -secretase enzyme: A) Energy average of canonical PS2 function and M239I, M239V mutations; B) Energy average and characterization for the wild type and mutated moonlighting function Ser130Leu; C) Energy average and characterization for the moonlighting wild type and mutated Thr122Arg function.
